# Supplementary material for: Nutrients-Rich Food Index Scores and the Overall Survival of Ovarian Cancer Patients: Results from the Ovarian Cancer Follow-Up Study, a Prospective Cohort Study
Source: MDPI journal article supplement (doi:10.3390/nu15030717), 2023-01-31
Supplement: s1 [file s1]

**Supplementary Table S1. The components of NR, LIM, and NRF index scores \***

| Score                      | NR index score       |                                                           |                   | LIM index score      |
|----------------------------|----------------------|-----------------------------------------------------------|-------------------|----------------------|
|                            | Macronutrients       | Vitamins                                                  | Minerals          |                      |
| <b>NRF6.3 index score</b>  | Protein, fiber       | A, C                                                      | Ca, Fe            | SFA, Na, added sugar |
| <b>NRF9.3 index score</b>  | Protein, fiber       | A, C, E                                                   | Ca, Fe, Mg, K     | SFA, Na, added sugar |
| <b>NRF11.3 index score</b> | Protein, fiber       | A, B <sub>12</sub> , C, E                                 | Ca, Fe, Mg, Zn, K | SFA, Na, added sugar |
| <b>NRF15.3 index score</b> | MUFA, protein, fiber | A, B <sub>12</sub> , C, D, E, thiamin, riboflavin, folate | Ca, Fe, Zn, K     | SFA, Na, added sugar |

Abbreviations: Ca, calcium; Fe, iron; K, potassium; LIM, limited nutrients; Mg, magnesium; MUFA, monounsaturated fatty acid; Na, sodium; NR, nutrients-rich; NRF, nutrients-rich food; SFA, saturated fatty acid; Zn, zinc.

\* NR index scores are calculated through the sum of the content of NR in 100-kcal edible portion divided by the reference daily values for NR based on the 2000-kcal/d diet; LIM index score is calculated through the sum of content of LIM in 100-kcal edible portion divided by the reference daily values for LIM based on the 2000-kcal/d diet; NRF index scores are calculated through NR index scores subtracting LIM index score.

**Supplementary Table S2. Selected clinical and immunohistochemical characteristics and associations with overall survival among ovarian cancer patients**

| Characteristics                   | No. of deaths/total (%) | Adjusted HR (95% CI) |
|-----------------------------------|-------------------------|----------------------|
| <b>Clinical characteristics *</b> |                         |                      |
| Age at diagnosis (year)           |                         |                      |
| ≤ 50                              | 45/258 (17.44)          | 1.00 (Ref)           |
| > 50                              | 85/445 (19.10)          | 1.24 (0.85-1.79)     |
| Histological type                 |                         |                      |
| Serous                            | 92/479 (19.21)          | 1.00 (Ref)           |
| Non-serous                        | 38/224 (16.96)          | 1.71 (1.11-2.66)     |
| Histopathologic grade             |                         |                      |
| Well differentiated               | 5/56 (8.93)             | 1.00 (Ref)           |
| Moderately differentiated         | 7/48 (14.58)            | 1.12 (0.35-3.57)     |
| Poorly differentiated             | 118/599 (19.70)         | 1.76 (0.70-4.43)     |
| FIGO stage                        |                         |                      |
| I-II                              | 41/342 (11.99)          | 1.00 (Ref)           |
| III-IV                            | 89/338 (26.33)          | 2.54 (1.65-3.91)     |
| Residual lesions                  |                         |                      |
| No                                | 82/553 (14.83)          | 1.00 (Ref)           |
| < 1 cm                            | 31/106 (29.25)          | 1.73 (1.11-2.68)     |

|                                                         |                |                  |
|---------------------------------------------------------|----------------|------------------|
| ≥ 1 cm                                                  | 17/44 (38.64)  | 2.41 (1.39-4.16) |
| Comorbidities                                           |                |                  |
| No                                                      | 74/393 (18.83) | 1.00 (Ref)       |
| Yes                                                     | 56/310 (18.06) | 0.97 (0.68-1.38) |
| <b>Immunohistochemical characteristics <sup>†</sup></b> |                |                  |
| WT-1                                                    |                |                  |
| Positive                                                | 59/378 (15.61) | 1.00 (Ref)       |
| Negative                                                | 44/190 (23.16) | 2.42 (1.51-3.87) |
| ER                                                      |                |                  |
| Positive                                                | 81/454 (17.84) | 1.00 (Ref)       |
| Negative                                                | 30/129 (23.26) | 2.09 (1.24-3.52) |
| PR                                                      |                |                  |
| Positive                                                | 50/321 (15.58) | 1.00 (Ref)       |
| Negative                                                | 61/262 (23.28) | 1.60 (1.07-2.38) |
| Vimentin                                                |                |                  |
| Positive                                                | 29/156 (18.59) | 1.00 (Ref)       |
| Negative                                                | 65/359 (18.11) | 0.84 (0.51-1.38) |
| p53                                                     |                |                  |
| Positive                                                | 92/473 (19.45) | 1.00 (Ref)       |
| Negative                                                | 27/151 (17.88) | 0.94 (0.61-1.44) |

---

Abbreviations: CI, confidence interval; ER, Estrogen Receptor; FIGO, International Federation of Gynecology and Obstetrics; HR, hazard ratio; PR,

Progestogen Receptor; Ref, reference; WT-1, Wilms' tumor-1.

\* Mutually adjusted for all other clinical characteristics listed in the table.

† Adjusted for age at diagnosis ( $< 50$  or  $\geq 50$  years), FIGO stage (I–II, III–IV, and unknown), histological type (serous or non-serous), histopathologic grade (well, moderately, and poorly differentiated), residual lesions (none,  $< 1$ , and  $\geq 1$  cm), and comorbidities (yes or no).

**Supplementary Table S3.** Data collection on the consumptions of vegetable and fruit

| Variables       | Frequencies of consumption |             |                |                |              |                 |              |
|-----------------|----------------------------|-------------|----------------|----------------|--------------|-----------------|--------------|
| Vegetable       |                            |             |                |                |              |                 |              |
| Chinese cabbage | ≥ 2 times/day              | 1 times/day | 4-6 times/week | 2-3 times/week | 1 times/week | 2-3 times/month | almost never |
| Pakchoi         | ≥ 2 times/day              | 1 times/day | 4-6 times/week | 2-3 times/week | 1 times/week | 2-3 times/month | almost never |
| Kohlrabi        | ≥ 2 times/day              | 1 times/day | 4-6 times/week | 2-3 times/week | 1 times/week | 2-3 times/month | almost never |
| Rape            | ≥ 2 times/day              | 1 times/day | 4-6 times/week | 2-3 times/week | 1 times/week | 2-3 times/month | almost never |
| Spinach         | ≥ 2 times/day              | 1 times/day | 4-6 times/week | 2-3 times/week | 1 times/week | 2-3 times/month | almost never |
| Tomato          | ≥ 2 times/day              | 1 times/day | 4-6 times/week | 2-3 times/week | 1 times/week | 2-3 times/month | almost never |
| Pumpkin         | ≥ 2 times/day              | 1 times/day | 4-6 times/week | 2-3 times/week | 1 times/week | 2-3 times/month | almost never |
| Cucumber        | ≥ 2 times/day              | 1 times/day | 4-6 times/week | 2-3 times/week | 1 times/week | 2-3 times/month | almost never |
| Wax gourd       | ≥ 2 times/day              | 1 times/day | 4-6 times/week | 2-3 times/week | 1 times/week | 2-3 times/month | almost never |
| Celery          | ≥ 2 times/day              | 1 times/day | 4-6 times/week | 2-3 times/week | 1 times/week | 2-3 times/month | almost never |
| Eggplant        | ≥ 2 times/day              | 1 times/day | 4-6 times/week | 2-3 times/week | 1 times/week | 2-3 times/month | almost never |
| Broccoli        | ≥ 2 times/day              | 1 times/day | 4-6 times/week | 2-3 times/week | 1 times/week | 2-3 times/month | almost never |
| Cauliflower     | ≥ 2 times/day              | 1 times/day | 4-6 times/week | 2-3 times/week | 1 times/week | 2-3 times/month | almost never |
| Carrot          | ≥ 2 times/day              | 1 times/day | 4-6 times/week | 2-3 times/week | 1 times/week | 2-3 times/month | almost never |

|                |               |             |                |                |              |                 |              |
|----------------|---------------|-------------|----------------|----------------|--------------|-----------------|--------------|
| Other radishes | ≥ 2 times/day | 1 times/day | 4-6 times/week | 2-3 times/week | 1 times/week | 2-3 times/month | almost never |
| Pimento        | ≥ 2 times/day | 1 times/day | 4-6 times/week | 2-3 times/week | 1 times/week | 2-3 times/month | almost never |
| Pepper         | ≥ 2 times/day | 1 times/day | 4-6 times/week | 2-3 times/week | 1 times/week | 2-3 times/month | almost never |
| Agaric         | ≥ 2 times/day | 1 times/day | 4-6 times/week | 2-3 times/week | 1 times/week | 2-3 times/month | almost never |
| Mushroom       | ≥ 2 times/day | 1 times/day | 4-6 times/week | 2-3 times/week | 1 times/week | 2-3 times/month | almost never |
| Leeks          | ≥ 2 times/day | 1 times/day | 4-6 times/week | 2-3 times/week | 1 times/week | 2-3 times/month | almost never |
| Onion          | ≥ 2 times/day | 1 times/day | 4-6 times/week | 2-3 times/week | 1 times/week | 2-3 times/month | almost never |
| Garlic sprout  | ≥ 2 times/day | 1 times/day | 4-6 times/week | 2-3 times/week | 1 times/week | 2-3 times/month | almost never |
| Seaweed        | ≥ 2 times/day | 1 times/day | 4-6 times/week | 2-3 times/week | 1 times/week | 2-3 times/month | almost never |
| Lotus root     | ≥ 2 times/day | 1 times/day | 4-6 times/week | 2-3 times/week | 1 times/week | 2-3 times/month | almost never |
| Jujube         | ≥ 2 times/day | 1 times/day | 4-6 times/week | 2-3 times/week | 1 times/week | 2-3 times/month | almost never |
| Scallion       | ≥ 2 times/day | 1 times/day | 4-6 times/week | 2-3 times/week | 1 times/week | 2-3 times/month | almost never |
| Garlic         | ≥ 2 times/day | 1 times/day | 4-6 times/week | 2-3 times/week | 1 times/week | 2-3 times/month | almost never |
| Ginger         | ≥ 2 times/day | 1 times/day | 4-6 times/week | 2-3 times/week | 1 times/week | 2-3 times/month | almost never |
| <b>Fruit</b>   |               |             |                |                |              |                 |              |
| Apple          | ≥ 2 times/day | 1 times/day | 4-6 times/week | 2-3 times/week | 1 times/week | 2-3 times/month | almost never |

|              |                    |             |                |                |              |                 |              |
|--------------|--------------------|-------------|----------------|----------------|--------------|-----------------|--------------|
| Pear         | $\geq 2$ times/day | 1 times/day | 4-6 times/week | 2-3 times/week | 1 times/week | 2-3 times/month | almost never |
| Orange       | $\geq 2$ times/day | 1 times/day | 4-6 times/week | 2-3 times/week | 1 times/week | 2-3 times/month | almost never |
| Banana       | $\geq 2$ times/day | 1 times/day | 4-6 times/week | 2-3 times/week | 1 times/week | 2-3 times/month | almost never |
| Watermelon   | $\geq 2$ times/day | 1 times/day | 4-6 times/week | 2-3 times/week | 1 times/week | 2-3 times/month | almost never |
| Peach        | $\geq 2$ times/day | 1 times/day | 4-6 times/week | 2-3 times/week | 1 times/week | 2-3 times/month | almost never |
| Pineapple    | $\geq 2$ times/day | 1 times/day | 4-6 times/week | 2-3 times/week | 1 times/week | 2-3 times/month | almost never |
| Kiwi fruit   | $\geq 2$ times/day | 1 times/day | 4-6 times/week | 2-3 times/week | 1 times/week | 2-3 times/month | almost never |
| Grape        | $\geq 2$ times/day | 1 times/day | 4-6 times/week | 2-3 times/week | 1 times/week | 2-3 times/month | almost never |
| Strawberry   | $\geq 2$ times/day | 1 times/day | 4-6 times/week | 2-3 times/week | 1 times/week | 2-3 times/month | almost never |
| Other fruits | $\geq 2$ times/day | 1 times/day | 4-6 times/week | 2-3 times/week | 1 times/week | 2-3 times/month | almost never |

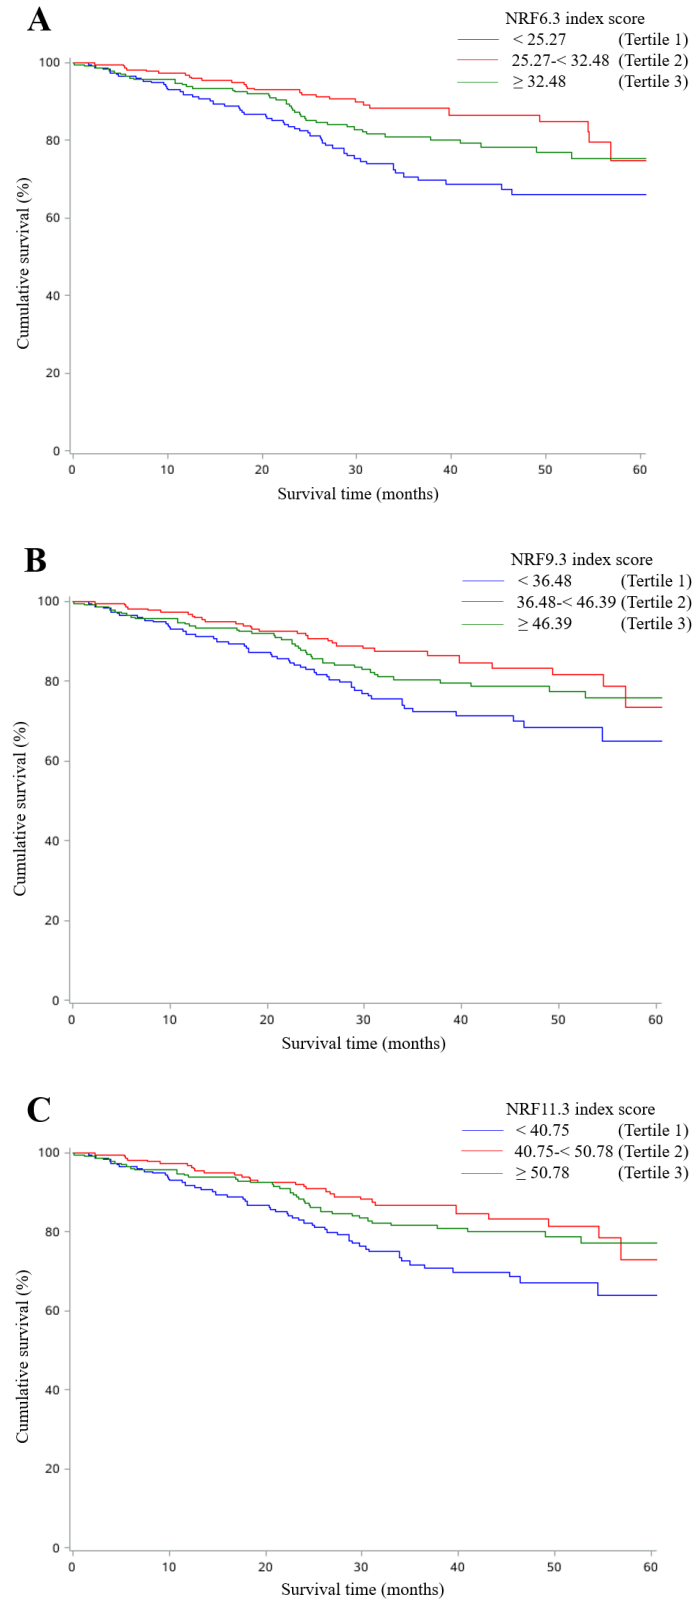

**Supplementary Figure S1. Kaplan–Meier survival curves for NRF6.3 index score (A), NRF9.3 index score (B), NRF11.3 index score (C)**

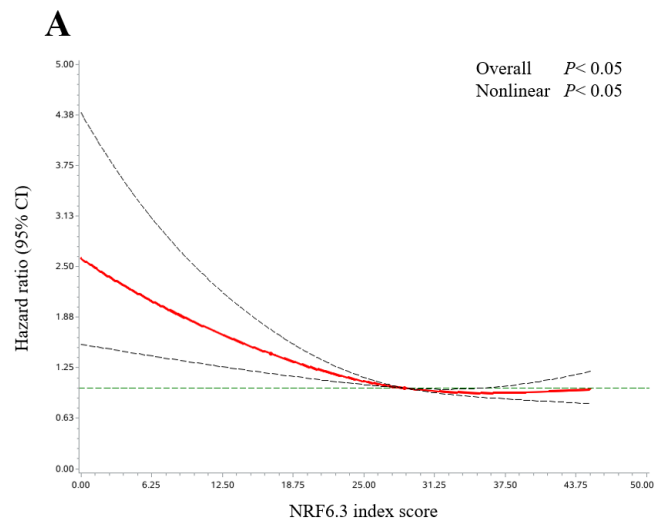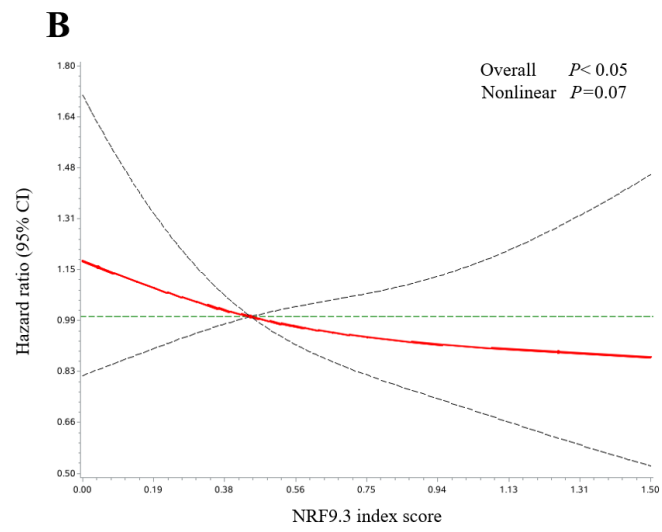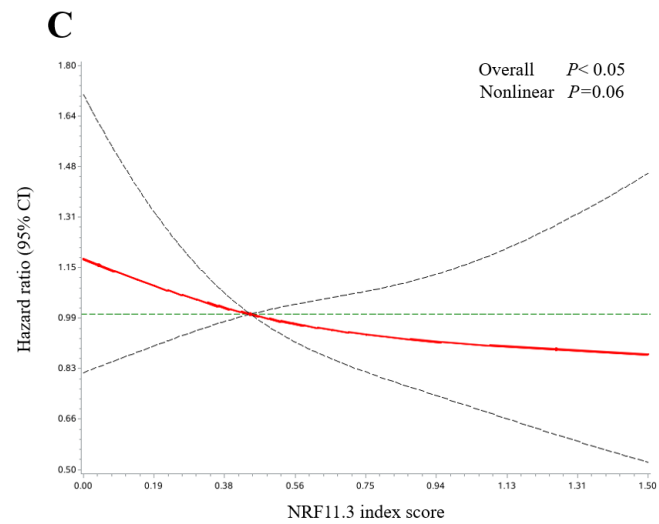

**Supplementary Figure S2. HRs and 95% CIs of overall survival among OC patients by NRF6.3 index score (A), NRF9.3 index score (B), NRF11.3 index score (C).** The associations were adjusted for age at diagnosis, education, cigarette smoking, alcohol drinking, monthly household income, dietary change, menopausal status, parity, body mass index, physical activity, FIGO stage, histological type, histopathologic grade, residual lesions, comorbidities, and total energy intake. The red line and dashed line represent the estimated HRs and their 95% CIs, respectively. Abbreviations: CI, confidence interval; HR, hazard ratio; OC, ovarian cancer.
